# Supplementary material for: Treatment of Attention-Deficit Hyperactivity Disorder: Patterns of Evolving Care During the First Treatment Episode
Source: Atypon-hosted journal article supplement (doi:10.1176/appi.ps.201000532), 2012-02-01

Figure 2: Survival curves for adding or switching to second treatment for children initiating treatment with medication or psychosocial intervention for key covariates

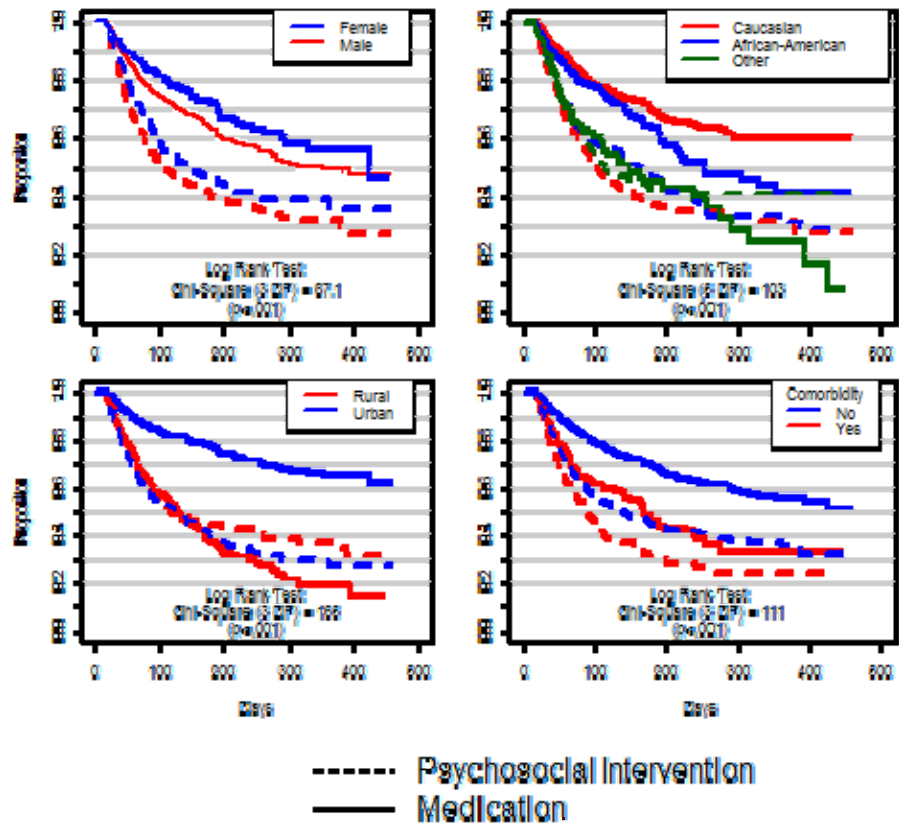

Supplement: pss6302_0122_ds2.pdf [file pss6302_0122_ds2.pdf]
