# Supplementary figures and images for: Treatment of Attention-Deficit Hyperactivity Disorder: Patterns of Evolving Care During the First Treatment Episode
Source: Atypon-hosted journal article supplement (doi:10.1176/appi.ps.201000532), 2012-02-01

Figure 1. Initial treatment with first transition

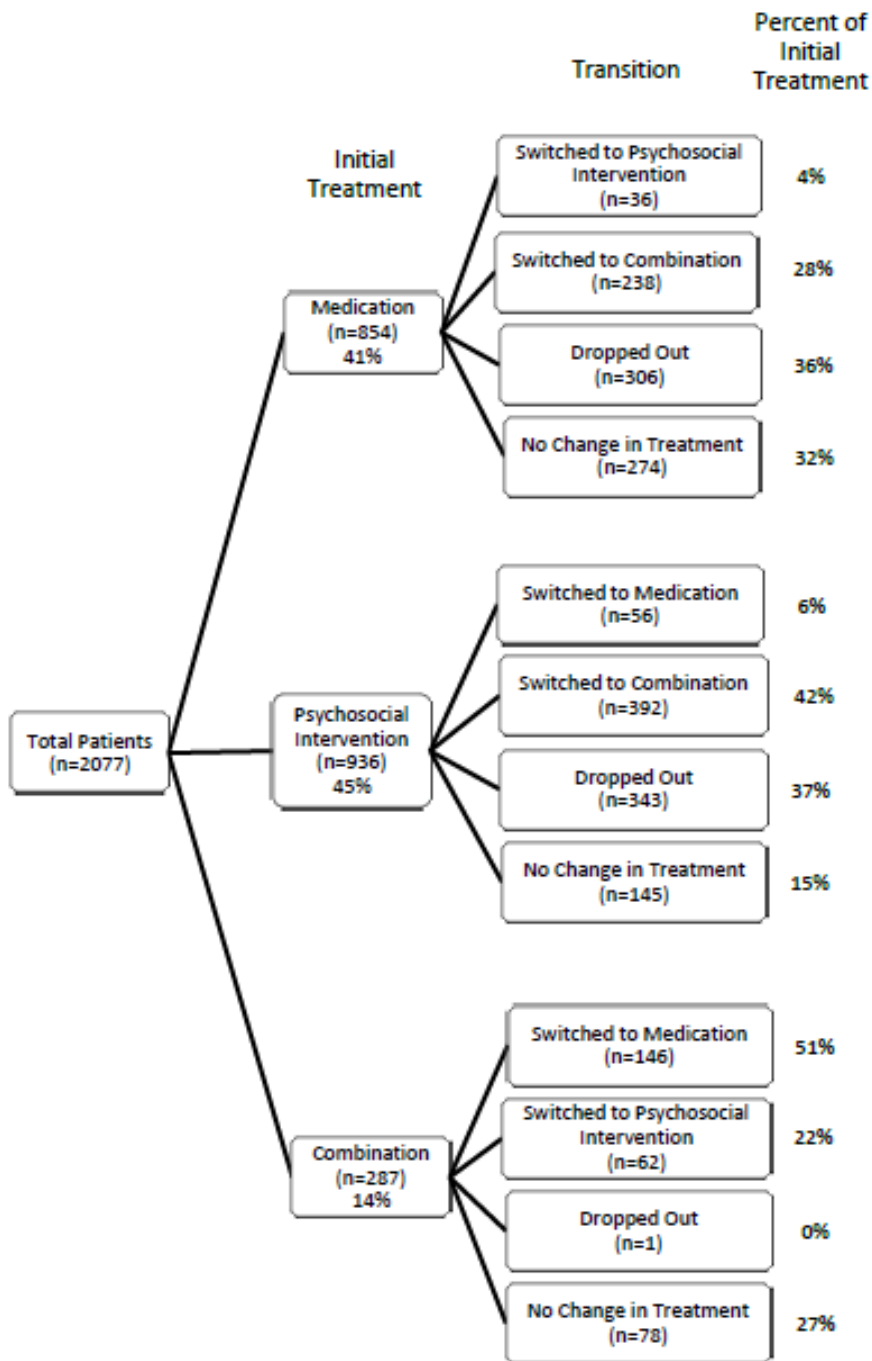

Supplement: pss6302_0122_ds.pdf [file pss6302_0122_ds.pdf]
